# Supplementary material
Source: PubMed Central journal article supplement (PMC1783389)

M6CD M6PI M6DI M6IQ

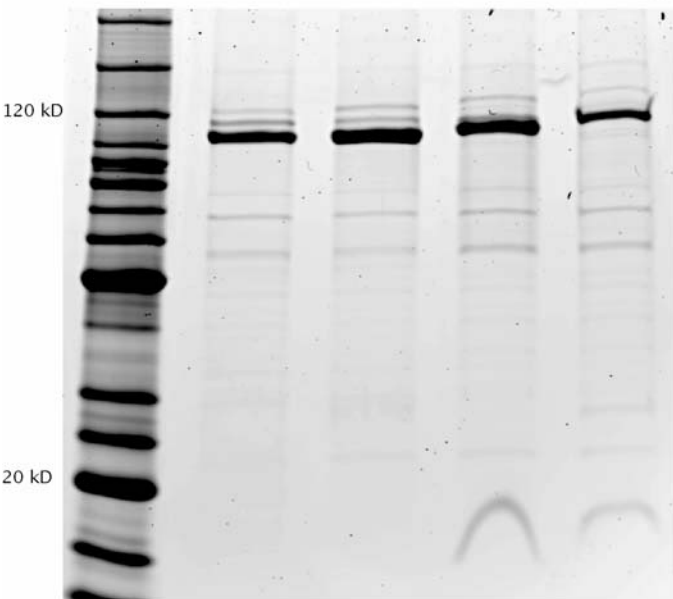

M6CD M6PI M6DI M6IQ

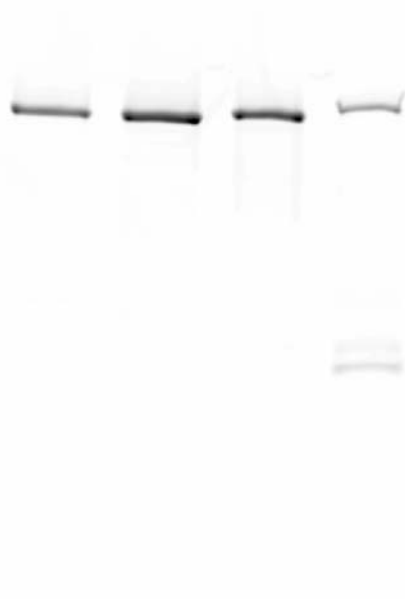

Sypro Ruby Stain

YFP Scan

Supplement: pnas_0610144104_1.pdf [file pnas_0610144104_1.pdf]
